# Supplementary material
Source: PubMed Central journal article supplement (PMC2888254)

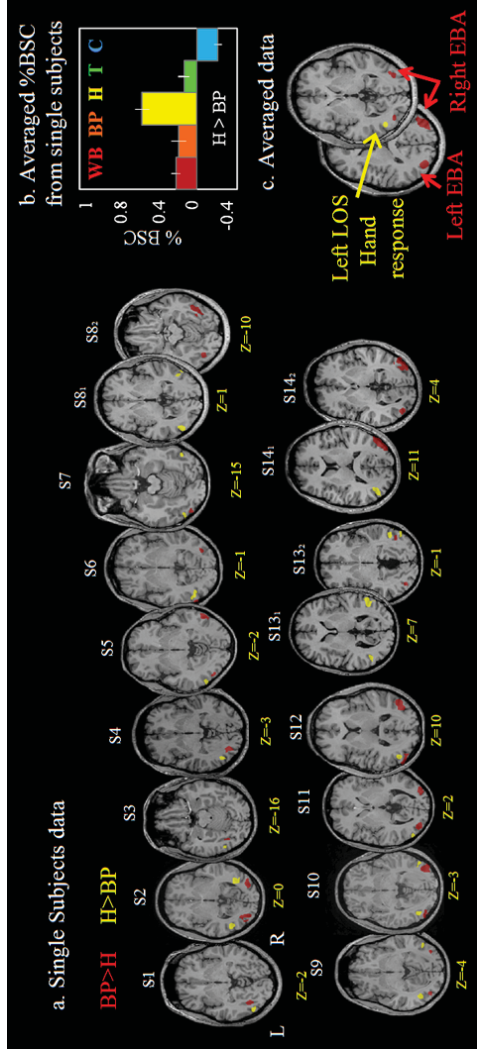

Supplement: 00215.2010_1.pdf [file 00215.2010_1.pdf]

Fingers Hands Body-Parts Feet Robotic-Hands

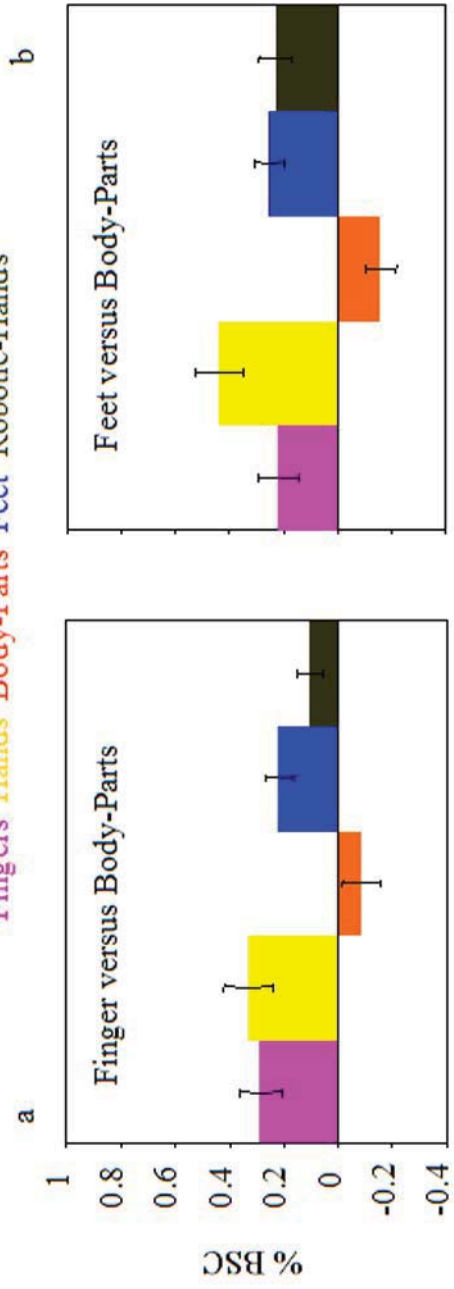

Supplement: 00215.2010_2.pdf [file 00215.2010_2.pdf]
